# Supplementary material for: Cobalt oxide/cerium oxide heterogeneous interfaces as advanced durable and bifunctional electrocatalysts for robust industrially relevant overall water splitting
Source: Royal Society of Chemistry journal article supplement (doi:10.1039/d4ta05895j), 2024-01-01
Supplement: d4ta05895j1.pdf [file d4ta05895j1.pdf]

## Supporting Information

# Cobalt oxide/cerium oxide heterogeneous interfaces as advanced durable and bifunctional electrocatalyst for robust industrial relevant overall water splitting

Akbar I. Inamdar<sup>\*a</sup>, Amol S. Salunke<sup>a</sup>, Jun Ho Seok<sup>b</sup>, Harish S. Chavan<sup>a</sup>, Nabeen K. Shrestha<sup>a</sup>,  
Sang Uck Lee<sup>\*b</sup>, Sangeun Cho<sup>\*a</sup>, Hyunsik Im<sup>a</sup>

<sup>a</sup>Division of System Semiconductor, College of AI Convergence, Dongguk University, Seoul,  
04620, Republic of Korea.

<sup>b</sup> School of Chemical Engineering, Sungkyunkwan University, Suwon 16149, Republic of Korea

### \*Corresponding Authors

\*E-mail: akbarphysics2002@gmail.com (A. I. I.), suleechem@skku.edu (S. U .L.),  
sangeun.c@dongguk.edu (S. C.)

**Table S1.** Literature survey and comparison of various electrocatalysts in terms of the OER, HER, and cell voltages required to reach a current density of 10 mAcm<sup>-2</sup>.

| Sr. No | Catalysts                                                                                                  | Cell Voltage (V) @10mAcm <sup>-2</sup> KOH or NaOH | $\eta$ (mV) @10mAcm <sup>-2</sup> In KOH or NaOH |                             | Ref. |
|--------|------------------------------------------------------------------------------------------------------------|----------------------------------------------------|--------------------------------------------------|-----------------------------|------|
|        |                                                                                                            |                                                    | OER                                              | HER                         |      |
| 1.     | NiFe LDH-NS@DG10 hybrid catalyst                                                                           | 1.5 @20mAcm <sup>-2</sup> (1 M KOH)                | 210 @10mAcm <sup>-2</sup>                        | 115 @20mAcm <sup>-2</sup>   | [1]  |
| 2.     | Nonprecious CuFe Composite                                                                                 | 1.64 (1 M KOH)                                     | 218                                              | 158                         | [4]  |
| 3.     | defect-rich ultrathin Co(OH) <sub>2</sub> (D-U-Co(OH) <sub>2</sub> )                                       | -                                                  | 223                                              | -                           | [8]  |
| 4.     | Nanosized CoNi Hydroxide@Hydroxysulfide                                                                    | -                                                  | 274 (0.10 M KOH)                                 | -                           | [9]  |
| 5.     | Boronized NiFe                                                                                             | -                                                  | 309 (1 M KOH)                                    | -                           | [10] |
| 6.     | V-doped Ni <sub>3</sub> S <sub>2</sub> nanowire                                                            | -                                                  | -                                                | 39 (1 M KOH)                | [12] |
| 7.     | Ru single-atom on cobalt-iron bimetallic-alloy encapsulated by graphitic carbon (RuSACoFe <sub>2</sub> /G) | 1.48 (1M KOH)                                      | 180                                              | 129                         | [14] |
| 8.     | CoN nanowire                                                                                               | -                                                  | 290 (1 M KOH)                                    | -                           | [15] |
| 9.     | Highly densed NiS-CoS nanorod arrays                                                                       | 1.47 (1 M KOH)                                     | F170                                             | 102                         | [16] |
| 10.    | nickel iron diselenide                                                                                     | -                                                  | 195 (1 M KOH)                                    | -                           | [17] |
| 11.    | Carbon coated porous nickel phosphides nanoplates                                                          | -                                                  | 300 (1 M KOH)                                    | -                           | [18] |
| 12.    | Fe-doped Ni <sub>3</sub> Se <sub>4</sub> ultrathin nanosheets                                              | 1.60 (1M KOH)                                      | 225                                              | 173                         | [19] |
| 13     | Fe-doped Co <sub>3</sub> O <sub>4</sub> hierarchical NPs composed of ultrathin nanosheets                  | -                                                  | 262                                              | -                           | [21] |
| 14.    | Au-doped Co-Ni Hydroxide                                                                                   | 1.75 (1M NaOH)<br>1.9 (6 M NaOH)                   | 340                                              | 200                         | [25] |
| 15.    | Anion insertion enhanced NiCeO <sub>x</sub> H <sub>y</sub>                                                 | -                                                  | 177                                              | -                           | [26] |
| 16.    | Nickel-Chromium Layered Double Hydroxide (NiCr-LDH)                                                        | 1.55 (1M KOH)                                      | 319 @ 100mAcm <sup>-2</sup>                      | 138 @ 100mAcm <sup>-2</sup> | [27] |

|     |                                                                                                              |                  |                                         |                                                                    |      |
|-----|--------------------------------------------------------------------------------------------------------------|------------------|-----------------------------------------|--------------------------------------------------------------------|------|
| 17  | NiFe and CoFe -LDHs                                                                                          | -                | 348 (NiFe)<br>404 (CoFe)                | -                                                                  | [28] |
| 18. | Self-supported NiMo-based nanowire arrays                                                                    | 1.507 (1M KOH)   | 230                                     | 22                                                                 | [29] |
| 19. | N-doped graphene layer coated Fe-Ni alloy nanoparticles encapsulated within an N-doped carbon hollow nanobox | 1.701 (1M KOH)   | 270                                     | 201                                                                | [30] |
| 20. | Phase-pure pentlandite Ni <sub>4.3</sub> Co <sub>4.7</sub> S <sub>8</sub> binary sulfide                     | 1.67 (1M KOH)    | 133.8<br>@20mAc <sup>m-2</sup>          | 148<br>@10mAc <sup>m-2</sup>                                       | [31] |
| 21. | Nickel-Iron/Nanocarbon Hybrids                                                                               | 1.58 (1M KOH)    | 330                                     | 219                                                                | [32] |
| 22. | Ni(OH) <sub>2</sub> /Ni <sub>3</sub> S <sub>2</sub> hybrid nanosheet arrays                                  | 1.57 (1M KOH)    | 270<br>@20mAc <sup>m-2</sup>            | 200                                                                | [33] |
| 23. | NiCo-LDH                                                                                                     | -                | 293<br>(0.1M KOH)                       | -                                                                  | [34] |
| 24. | Enabling and Inducing Oxygen Vacancies in Se@CoFe-LDH                                                        | -                | 251<br>1M KOH<br>@ 50mAc <sup>m-2</sup> | 222<br>0.5M H <sub>2</sub> SO <sub>4</sub><br>50mAc <sup>m-2</sup> | [35] |
| 25. | Ce-Doped NiFe -LDH                                                                                           | -                | 227                                     | -                                                                  | [36] |
| 26. | Bimetallic iron-iridium alloy nanoparticles/NF (FeIr/NF)                                                     | 1.48<br>(1M KOH) | 200<br>@<br>20mAc <sup>m-2</sup>        | 16.6<br>@<br>20mAc <sup>m-2</sup>                                  | [37] |
| 27. | FeNiSSe nanotube                                                                                             | 1.56<br>(1M KOH) | 213                                     | 91.2                                                               | [38] |
| 28. | CoNiP-CoNi alloy                                                                                             | 1.76<br>(1M KOH) | 300                                     | 150                                                                | [39] |
| 29. | Ni-Co-Fe mixed sulfide ultrathin nanosheets on Ni nanocones                                                  | 1.54<br>(1M KOH) | 207                                     | 106                                                                | [40] |
| 30. | porous Co <sub>0.75</sub> Ni <sub>0.25</sub> (OH) <sub>2</sub> nanosheets                                    | 1.56<br>(1M KOH) | 235                                     | 94                                                                 | [41] |
| 31. | Co-Ni-B                                                                                                      | 1.72<br>(1M KOH) | 313                                     | 205                                                                | [42] |
| 32. | NiCo-LDH                                                                                                     | 1.66<br>(1M KOH) | 271                                     | 162                                                                | [43] |
| 33. | p-NFNR@Ni-Co-P                                                                                               | 1.62<br>(1M KOH) | 272                                     | 125                                                                | [44] |
| 34. | Ni-Co-P                                                                                                      | 1.62<br>(1M KOH) | 270                                     | 107                                                                | [45] |
| 35. | Co(OH) <sub>2</sub> @NCNTs                                                                                   | 1.72<br>(1M KOH) | 270                                     | 170                                                                | [46] |
| 36. | Mo-NiCo <sub>2</sub> O <sub>4</sub> /Co <sub>5.47</sub> N/NF                                                 | 1.56<br>(1M KOH) | 270<br>@50mAc <sup>m-2</sup>            | 170<br>@50mAc <sup>m-2</sup>                                       | [47] |

|     |                                 |                  |     |     |      |
|-----|---------------------------------|------------------|-----|-----|------|
| 37. | nickel–cobalt bimetal phosphide | 1.59<br>(1M KOH) | 245 | 129 | [48] |
| 38. | NiV LDH                         | -                | 200 | -   | [79] |

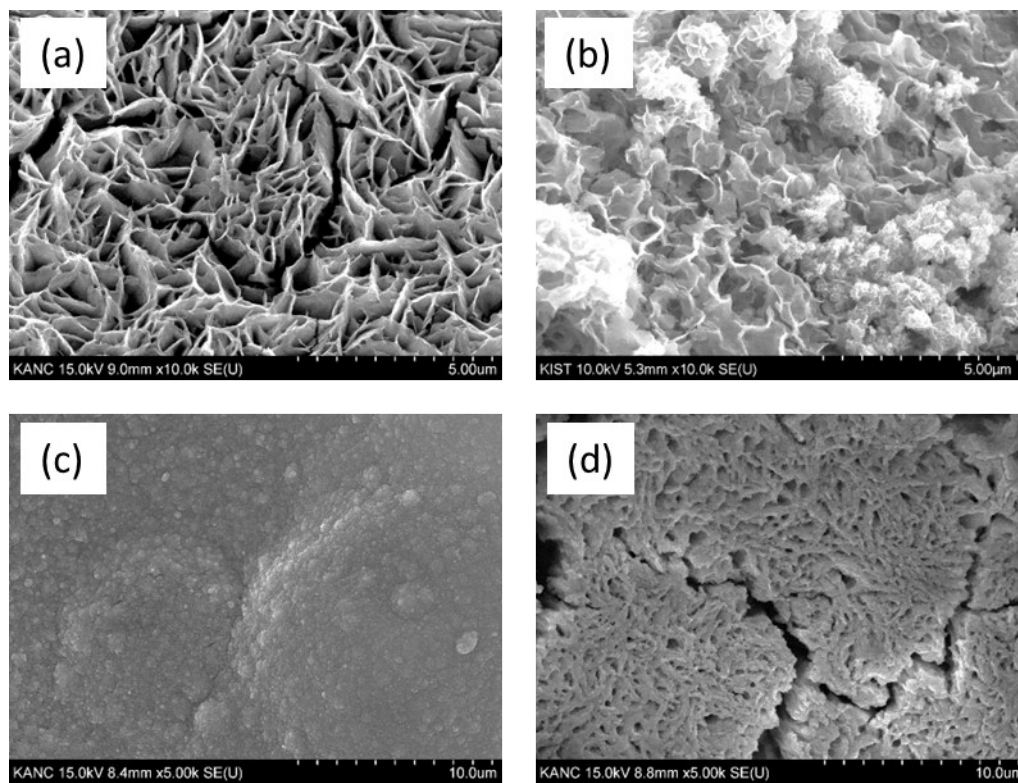

**Fig. S1.** Low-magnification SEM images of (a)  $\text{Co(OH)}_2$ , (b)  $\text{Co}_{0.85}\text{Ce}_{0.15}$ , (c)  $\text{Co}_{0.50}\text{Ce}_{0.50}$ , (d)  $\text{CeO}_2$ .

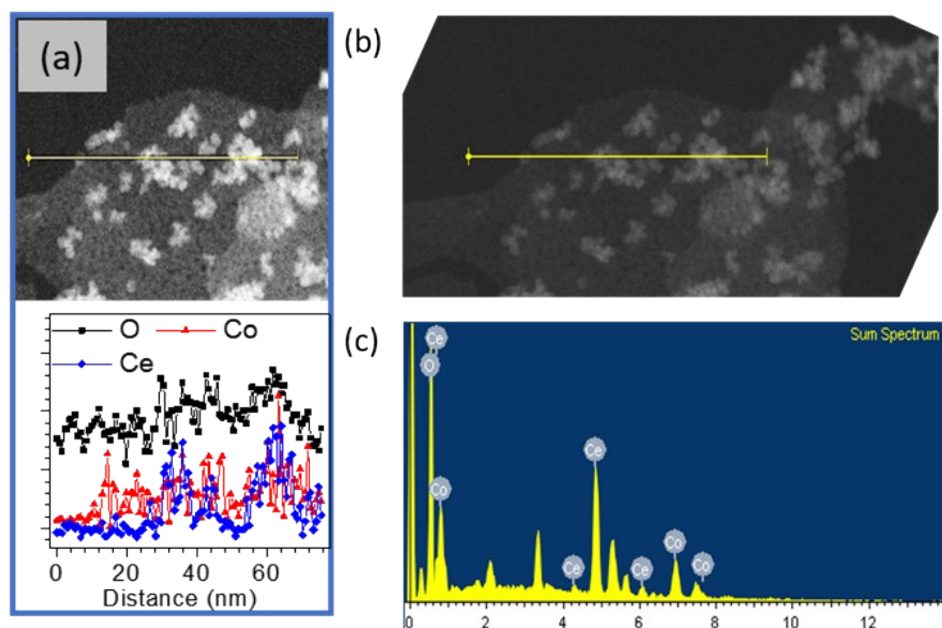

**Fig. S2.** (a) Line-scanning profiles of O, Ce and Ce along the line in the STEM image (scale bar is 75nm), (b, c) EDX elemental analysis of the  $\text{Co}_{0.85}\text{Ce}_{0.15}$  showing its chemical composition characteristics.

**Table S2.** Elemental analysis using EDAX for the sample  $\text{Co}_{0.85}\text{Ce}_{0.15}$ .

| Element | Wt%   | Atomic % |
|---------|-------|----------|
| O       | 25.38 | 64.67    |
| Co      | 33.99 | 23.51    |
| Ce      | 40.63 | 11.82    |

**Table S3** Amount of the Co and Ce in percentage determined via ICP-MS measurements

| Sample Name                               | 59 Co [ He]                                  |         | 140 Ce [ No gas]                             |         |
|-------------------------------------------|----------------------------------------------|---------|----------------------------------------------|---------|
|                                           | Concentration <i>ppm</i> ( $\mu\text{g/g}$ ) | RSD (%) | Concentration <i>ppm</i> ( $\mu\text{g/g}$ ) | RSD (%) |
| Co <sub>0.95</sub> Ce <sub>0.05</sub>     | 103180.892                                   | 3.5     | 123897.332                                   | 0.3     |
| <b>Co<sub>0.85</sub>Ce<sub>0.15</sub></b> | 27528.358                                    | 1.1     | 86966.297                                    | 0.1     |
| Co <sub>0.75</sub> Ce <sub>0.25</sub>     | 11861.818                                    | 0.6     | 92447.590                                    | 1.3     |
| Co <sub>0.50</sub> Ce <sub>0.50</sub>     | 95243.324                                    | 0.3     | 9433.036                                     | 1.0     |

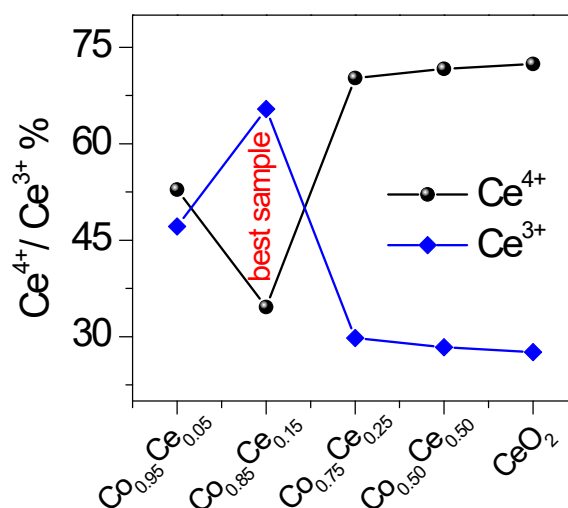

**Fig. S3.** Variation in the Ce oxidation state in Co<sub>1-x</sub>Ce<sub>x</sub>, (where x = 0.05, 0.15, 0.25, and 0.50) and CeO<sub>2</sub> catalysts analysed using XPS.

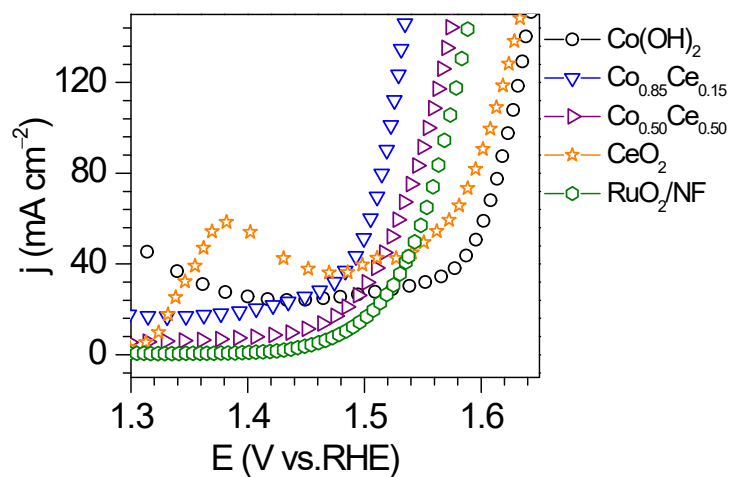

**Fig. S4.** Enlarged view of the  $iR$ -corrected LSV curves of  $\text{Co(OH)}_2$ ,  $\text{Co}_{1-x}\text{Ce}_x$  (where  $x = 0.15$  and  $0.50$ ), and  $\text{CeO}_2$  catalysts recorded in a 1M KOH electrolyte at a scan rate of  $5 \text{ mVs}^{-1}$  for the OER.

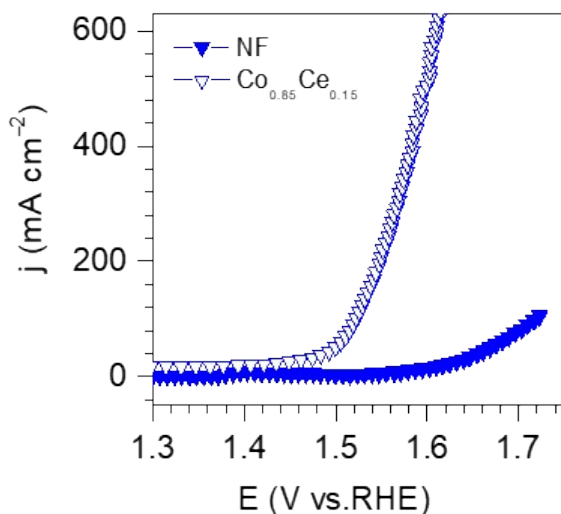

**Fig. S5.**  $iR$ -corrected LSV curves for the Ni foam in comparison with  $\text{Co}_{0.85}\text{Ce}_{0.15}$  to determine the contribution of Ni foam to OER activity.

### 1.1 Conversion equations for an SCE to an RHE

$$E(\text{RHE}) = E_{1(\text{SCE})} + E_{0(\text{SCE})} + 0.0591\text{pH} \quad (1)$$

where  $E_1$  is the actual measured potential and  $E_0$  is the standard potential for the SCE (0.241 V). The pH of the 1 M KOH electrolyte was 13.68.

$$E_{(\text{RHE})} = E_{1(\text{SCE})} + 0.241 + 0.0591*(13.68)$$

$$E_{(\text{RHE})} = E_{1(\text{SCE})} + 0.241 + 0.809$$

$$E_{(\text{RHE})} = E_{1(\text{SCE})} + 1.05$$

**Table S4.** Electrochemical parameters including the overpotential at different current densities and Tafel slopes for  $\text{Co}(\text{OH})_2$ ,  $\text{Co}_{1-x}\text{Ce}_x$ , and  $\text{CeO}_2$  catalysts in relation to the OER.

| Sample                                    | Overpotential (mV)     |                        | Tafel slope<br>(mV dec <sup>-1</sup> ) | Mass activity<br>(Ag <sup>-1</sup> ) |
|-------------------------------------------|------------------------|------------------------|----------------------------------------|--------------------------------------|
|                                           | @100mAcm <sup>-2</sup> | @500mAcm <sup>-2</sup> |                                        |                                      |
| <b>Co(OH)<sub>2</sub></b>                 | 393.4                  | 478.9                  | 109.7                                  | 1.95                                 |
| <b>Co<sub>0.85</sub>Ce<sub>0.15</sub></b> | <b>291.6</b>           | <b>368.1</b>           | <b>85.02</b>                           | <b>11.77</b>                         |
| <b>Co<sub>0.50</sub>Ce<sub>0.50</sub></b> | 324.1                  | 429.6                  | 120.0                                  | 8.76                                 |
| <b>CeO<sub>2</sub></b>                    | 378.0                  | 518.0                  | 165.7                                  | 5.60                                 |



## 1.2 Electrochemical surface area analysis of the Co<sub>1-x</sub>Ce<sub>x</sub>O catalysts

The ECSA of the Co(OH)<sub>2</sub>, Co<sub>1-x</sub>Ce<sub>x</sub>, and CeO<sub>2</sub> catalysts was estimated using CV curves measured at different scan rates in the non-Faradaic voltage region. **Fig. S6(a)** presents the CV curves for catalysts recorded at a scan rate of 55, 60, 70, 75, 80, 85, 90, 95, and 100 mVs<sup>-1</sup>. The ECSA of the catalyst was calculated using Eq. (2):<sup>[S1,S2]</sup>

$$\text{ECSA} = C_{\text{dl}} / C_{\text{s}} \quad (2)$$

where C<sub>S</sub> is the specific capacitance in an alkaline medium (0.040 mF cm<sup>-2</sup> for the KOH electrolyte) and C<sub>dl</sub> is the specific capacitance of the double-layer region. The slope of the capacitive current (Δj), measured at a non-Faradaic voltage of 0.05 V versus the scan rate (**Fig. S6b**), was used to obtain the ECSA of the catalyst. The double-layer capacitance and ECSA of the Co<sub>1-x</sub>Ce<sub>x</sub> samples are presented in **Table S5**. To accurately evaluate the intrinsic OER catalytic activity, we normalized the LSV curves for Co(OH)<sub>2</sub>, Co<sub>1-x</sub>Ce<sub>x</sub>, and CeO<sub>2</sub> catalysts by the ECSA.

**Table S5.** Estimation of the double-layer capacitance and ECSA from the CV curves recorded at different scan rates in the non-Faradaic voltage region for mixed phase Co(OH)<sub>2</sub>, Co<sub>1-x</sub>Ce<sub>x</sub> oxides, and CeO<sub>2</sub>.

| Sample                                    | Double-layer capacitances (μF cm <sup>-2</sup> ) | ECSA (cm <sup>2</sup> ) |
|-------------------------------------------|--------------------------------------------------|-------------------------|
| Co(OH) <sub>2</sub>                       | 0.208                                            | 5.2                     |
| <b>Co<sub>0.85</sub>Ce<sub>0.15</sub></b> | 0.300                                            | 7.5                     |
| Co <sub>0.50</sub> Ce <sub>0.50</sub>     | 0.192                                            | 4.8                     |
| CeO <sub>2</sub>                          | 0.234                                            | 5.85                    |

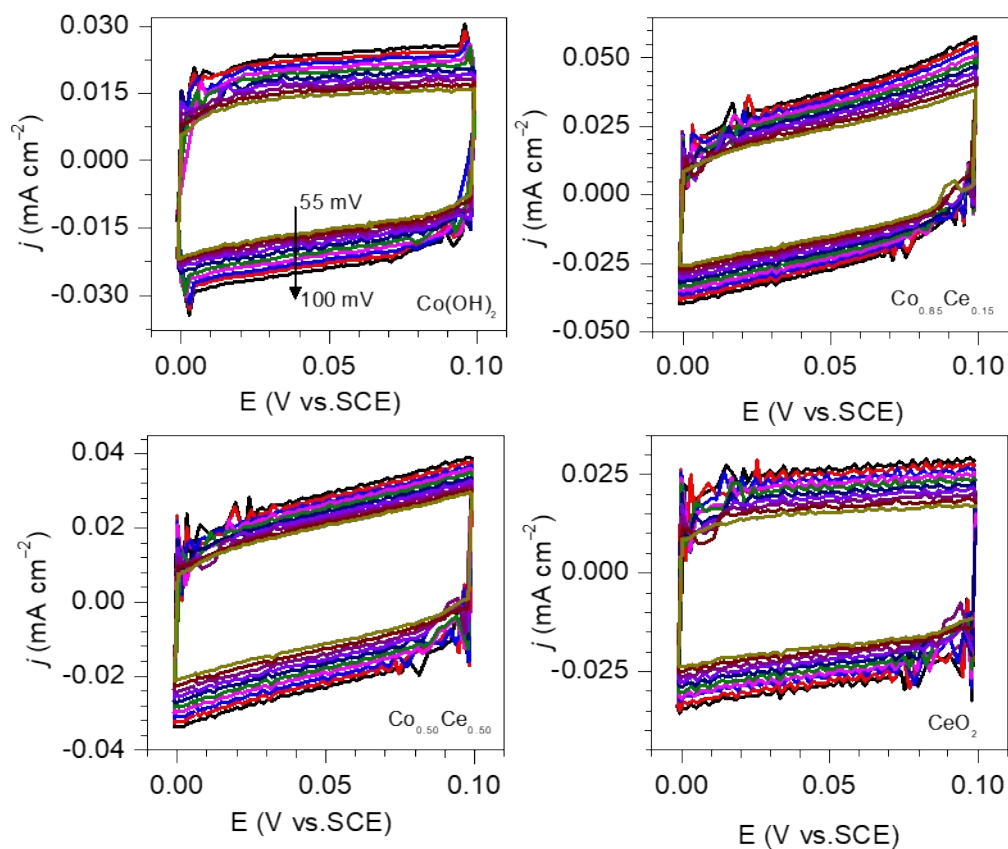

**Fig. S6. (a)** CV curves for  $\text{Co(OH)}_2$ ,  $\text{Co}_{1-x}\text{Ce}_x$ , (where  $x = 0.15$ , and  $0.50$ ) and  $\text{CeO}_2$  catalysts recorded at a scan rate of 55, 60, 65, 70, 75, 80, 85, 90, 95 and  $100 \text{ mVs}^{-1}$ .

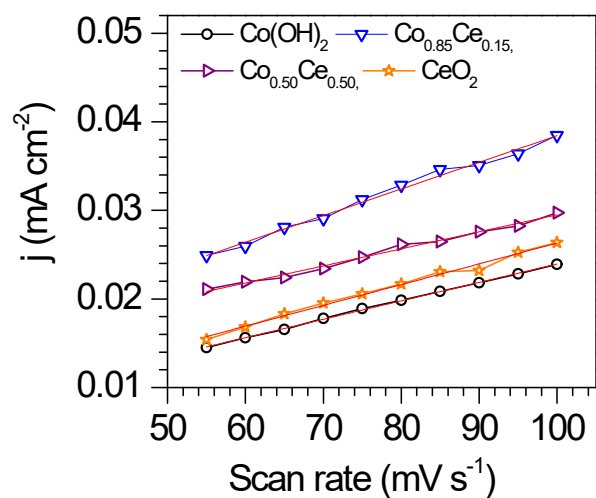

**Fig. 6(b).** Slope of the capacitive current ( $\Delta j$ ) measured at a non-Faradaic voltage of 0.05 V versus the scan rate.

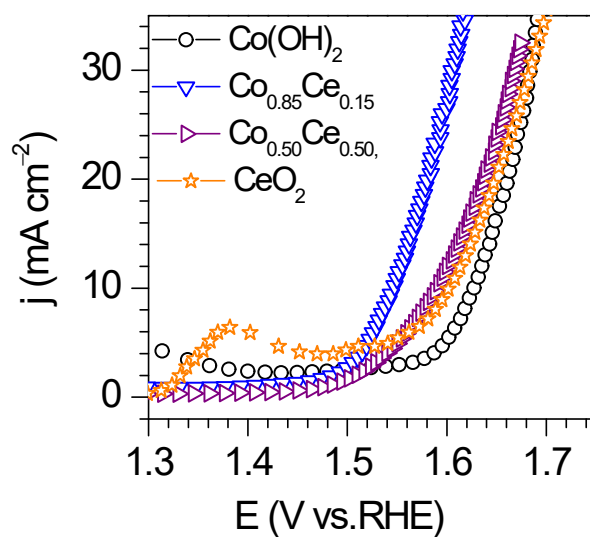

**Fig. S7.** The LSV curves of the  $\text{Co(OH)}_2$ ,  $\text{Co}_{1-x}\text{Ce}_x$ , and  $\text{CeO}_2$  catalysts in which the current density is normalized with the ECSA values.

### 1.3 Electrochemical impedance spectroscopy analysis of the $\text{Co}_{1-x}\text{Ce}_x$ catalysts

Electrochemical impedance spectroscopy (EIS) measurements were carried out to elucidate the electrocatalytic activity of the  $\text{Co}(\text{OH})_2$ ,  $\text{Co}_{1-x}\text{Ce}_x$ , and  $\text{CeO}_2$  catalysts. **Figure S8** presents the measured Nyquist plots for the  $\text{Co}_{1-x}\text{Ce}_x$ , pure  $\text{Co}(\text{OH})_2$ , and pure  $\text{CeO}_2$  catalysts and the corresponding equivalent circuit diagram. The Nyquist plots exhibited a small semi-circle in the high-frequency region and a straight line in the low-frequency region, which were associated with the charge-transfer resistance ( $R_2$ ) and Warburg impedance, respectively. The Nyquist curves were modelled using the equivalent circuit diagram (**Fig. S8**), in which  $R_1$  is the solution resistance,  $R_2$  is the charge-transfer resistance, and  $W_0$  is the Warburg impedance. The values for  $R_1$  and  $R_2$  estimated from the Nyquist plots are presented in **Table S6**. It was found that  $\text{Co}_{0.85}\text{Ce}_{0.15}$  had the lowest charge-transfer resistance ( $0.087\Omega$ ), which was much lower than that of the other catalysts. This low charge-transfer resistance and the fast kinetics of  $\text{Co}_{0.85}\text{Ce}_{0.15}$  were in accordance with its superior OER activity.

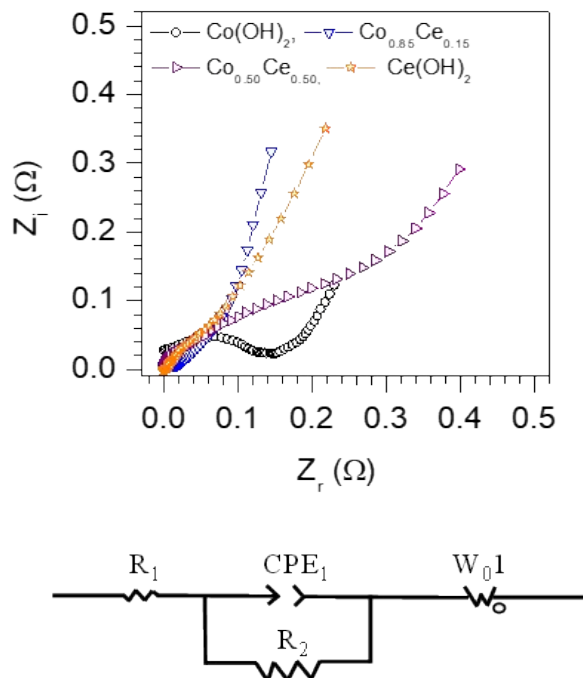

**Fig. S8.** Nyquist plots (normalized to zero- on the x-axis) for the  $\text{Co}(\text{OH})_2$ ,  $\text{Co}_{1-x}\text{Ce}_x$  (where  $x = 0.15$ , and  $0.50$ ), and  $\text{CeO}_2$  catalysts recorded at a 0-bias voltage and the equivalent circuit diagram used to fit the curves.

**Table S6.** EIS fitting parameters for the  $\text{Co}(\text{OH})_2$ ,  $\text{Co}_{1-x}\text{Ce}_x$  (where  $x = 0.15$ , and  $0.50$ ), and  $\text{CeO}_2$  catalysts.

| Sample                             | $R1$ ( $\Omega$ ) | $R2$ $\Omega$ |
|------------------------------------|-------------------|---------------|
| $\text{Co}(\text{OH})_2$           | 0.91              | 0.12          |
| $\text{Co}_{0.85}\text{Ce}_{0.15}$ | 0.87              | 0.087         |
| $\text{Co}_{0.50}\text{Ce}_{0.50}$ | 1.07              | 0.33          |
| $\text{CeO}_2$                     | 0.92              | 0.56          |

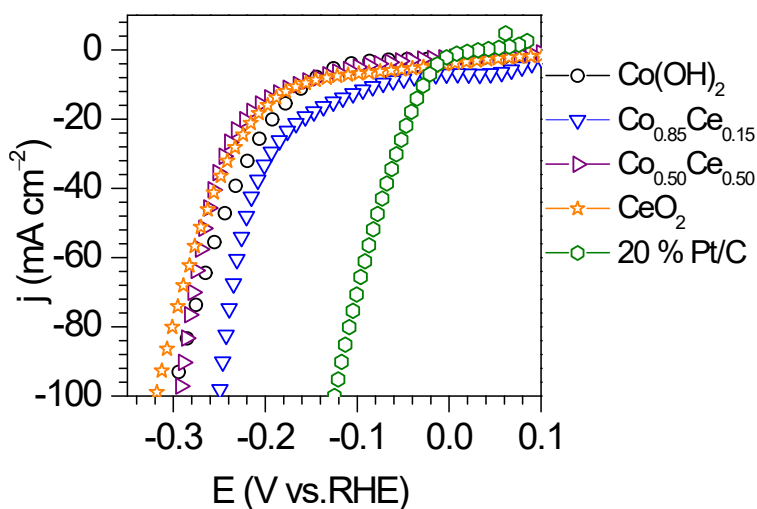

**Fig. S9.** Magnified view of the  $iR$ -corrected LSV curves recorded in a 1M KOH electrolyte at a scan rate of  $5 \text{ mVs}^{-1}$  for the HER for the  $\text{Co}(\text{OH})_2$ ,  $\text{Co}_{1-x}\text{Ce}_x$  (where  $x = 0.15$ , and  $0.50$ ), and  $\text{CeO}_2$  catalysts.

**Table S7.** Comparison of the HER overpotential and Tafel slope of the  $\text{Co}(\text{OH})_2$ ,  $\text{Co}_{1-x}\text{Ce}_x$  (where  $x = 0.15$ , and  $0.50$ ), and  $\text{CeO}_2$  catalysts.

| Sample                                               | Overpotential<br>(mV)<br>@ $10\text{mAcm}^{-2}$ | Overpotential<br>(mV)<br>@ $400\text{mAcm}^{-2}$ | Tafel slope<br>( $\text{mV dec}^{-1}$ ) |
|------------------------------------------------------|-------------------------------------------------|--------------------------------------------------|-----------------------------------------|
| $\text{Co}(\text{OH})_2$                             | 155.6                                           | 489.9                                            | 153.8                                   |
| <b><math>\text{Co}_{0.85}\text{Ce}_{0.15}</math></b> | <b>76.27</b>                                    | <b>301.1</b>                                     | <b>92.4</b>                             |
| $\text{Co}_{0.50}\text{Ce}_{0.50}$                   | 163.8                                           | 354.0                                            | 142.7                                   |
| $\text{CeO}_2$                                       | 169.6                                           | 491.6                                            | 154.7                                   |

**Table S8.** The concentrations of the Co and Ce species detected after the stability tests via ICP-MS analysis

| Electrolyte          | 56 Fe [ H2]                                     |     | 59 Co [ He]                                     |     | 140 Ce [ No gas]                                |     |
|----------------------|-------------------------------------------------|-----|-------------------------------------------------|-----|-------------------------------------------------|-----|
|                      | Concentration<br><i>ppm</i> ( $\mu\text{g/g}$ ) | RSD | Concentration<br><i>ppm</i> ( $\mu\text{g/g}$ ) | RSD | Concentration<br><i>ppm</i> ( $\mu\text{g/g}$ ) | RSD |
| Before stability KOH | 0.027                                           | 5.6 | 0.003                                           | 7.8 | ND                                              |     |
| After stability KOH  | 0.026                                           | 1.9 | 0.008                                           | 3.8 | ND                                              |     |

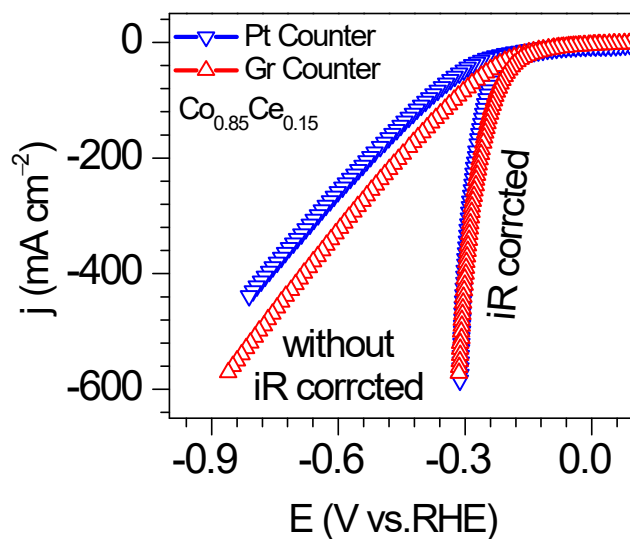

**Fig. S10.** HER polarization curves of the  $\text{Co}_{0.85}\text{Ce}_{0.15}$  catalyst with Pt and Graphite (Gr) as a counter electrode.

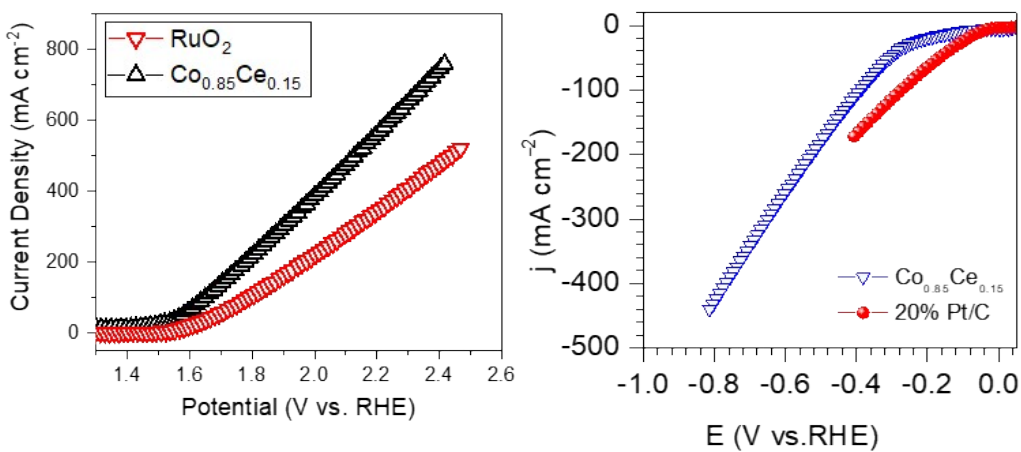

**Fig. S11.** Without iR-correction OER and HER polarization curves of the  $\text{Co}_{0.85}\text{Ce}_{0.15}$ ,  $\text{RuO}_2/\text{NF}$  and 20 % Pt/C in 1M KOH electrolyte.

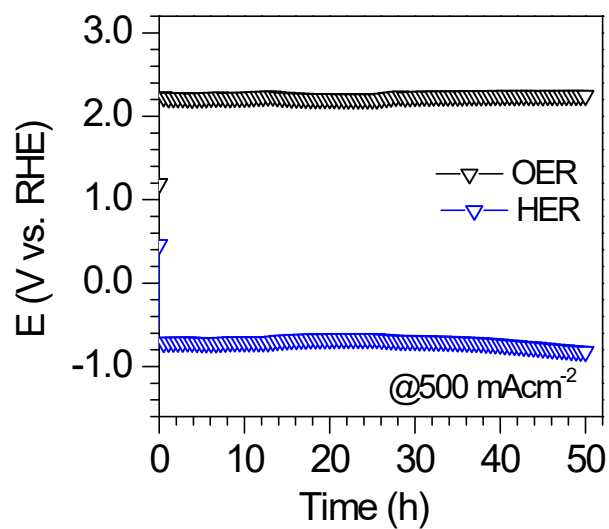

**Fig. S12.** Chronopotentiometry stability curve (without iR- correction) of best performing  $\text{Co}_{0.85}\text{Ce}_{0.15}$  sample at current density of  $500\text{-mA cm}^{-2}$  for 50 hours of continuous operation



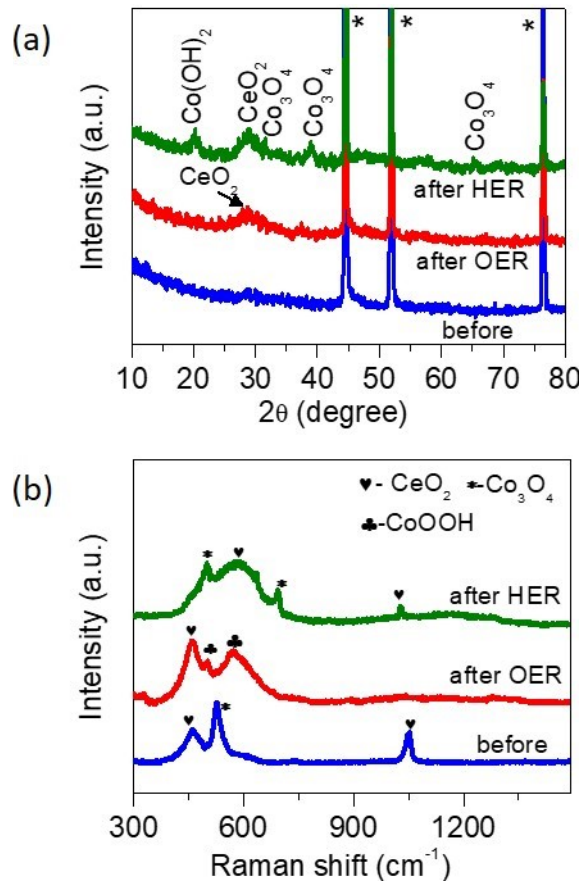

**Fig. S13.** Influence of long-term OER and HER measurements on the structural properties of  $\text{Co}_{0.85}\text{Ce}_{0.15}$  monitored using (a) XRD and (b) Raman analysis before and after OER/HER testing.

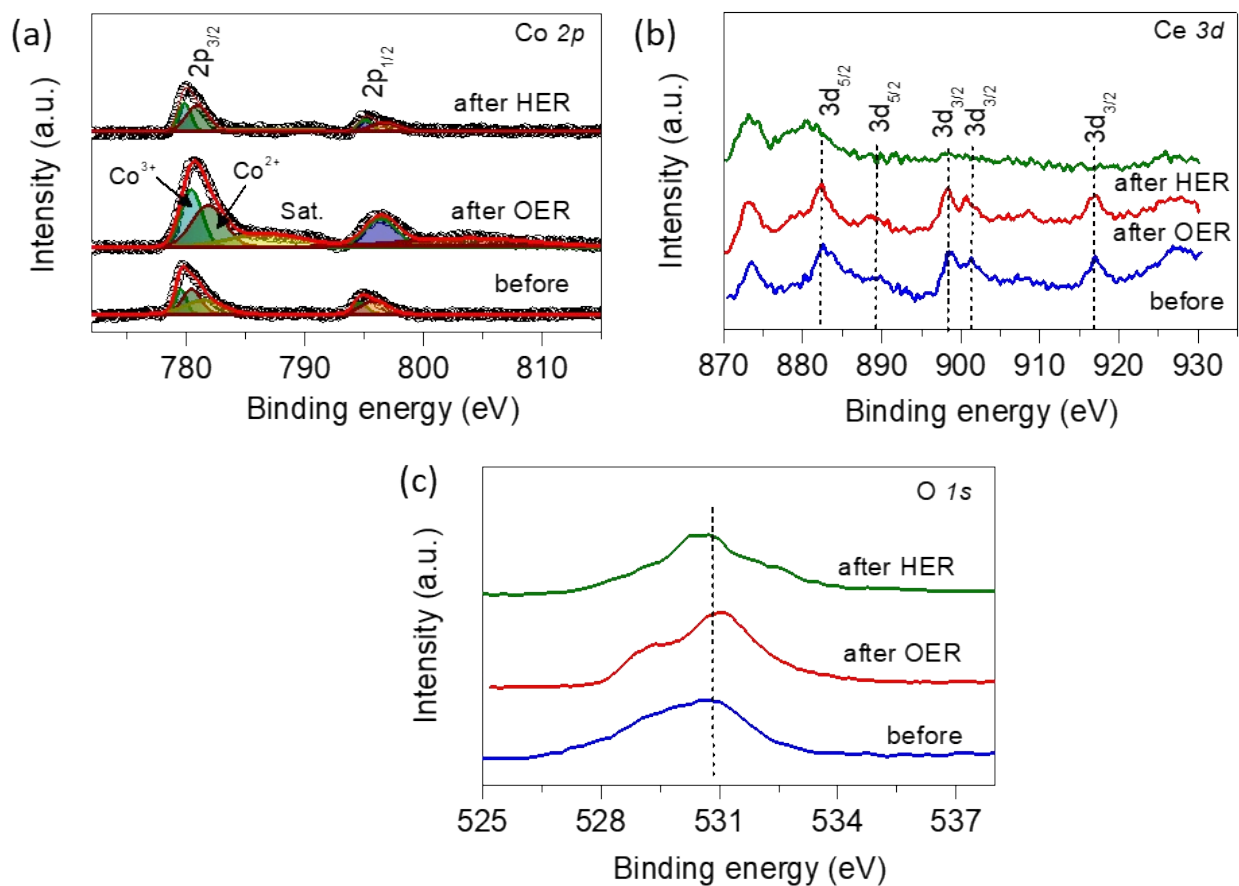

**Fig. S14.** Surface chemical oxidation states for  $\text{Co}_{0.85}\text{Ce}_{0.15}$  analysed using XPS measurements before and after OER/HER testing: (a) deconvoluted Co 2p, (b) deconvoluted Ce 3d, and (c) deconvoluted O 1s.

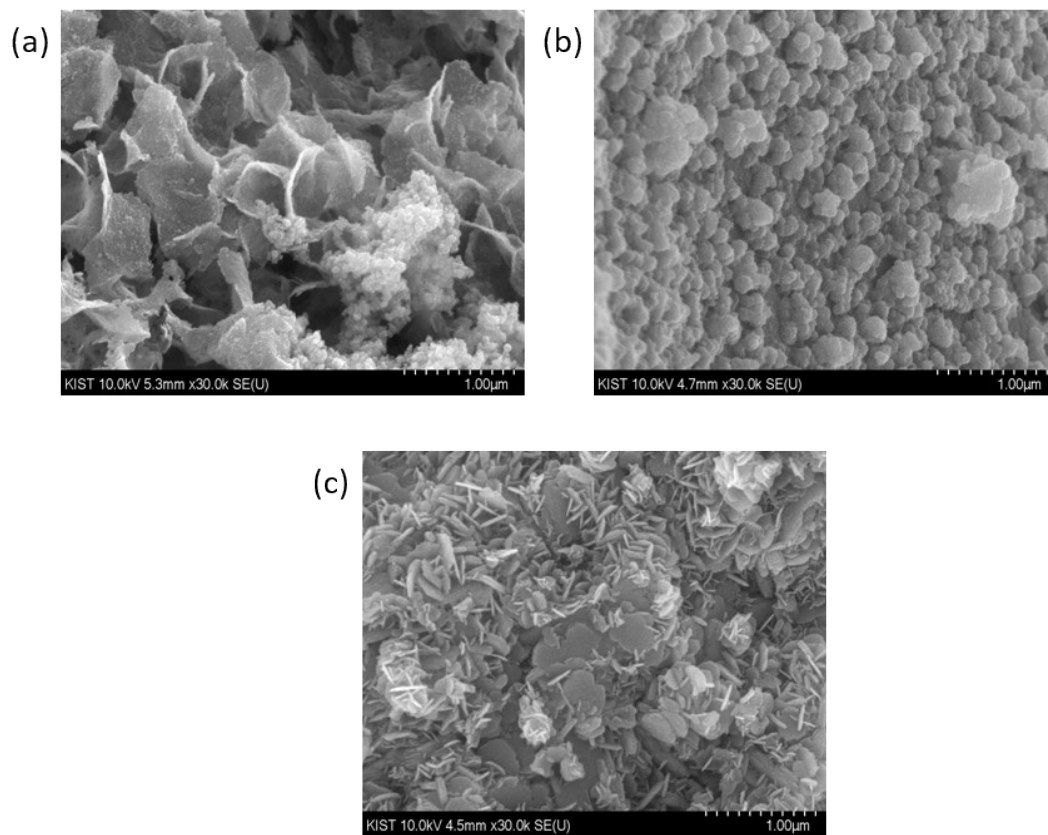

**Fig. S15.** Morphological analysis of  $\text{Co}_{0.85}\text{Ce}_{0.15}$  after long-term OER and HER stability testing: (a) before testing, (b) after the OER, and (c) after the HER.

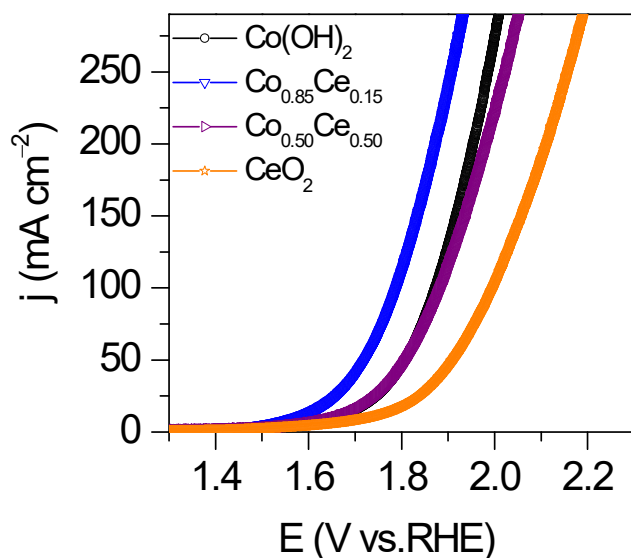

**Fig. S16.** Enlarged view of the polarization curves for the electrolyzers fabricated using Co(OH)<sub>2</sub> || Co(OH)<sub>2</sub>, Co<sub>1-x</sub>Ce<sub>x</sub> || Co<sub>1-x</sub>Ce<sub>x</sub>, (where x = 0.15, and 0.50) and CeO<sub>2</sub> || CeO<sub>2</sub> catalysts.

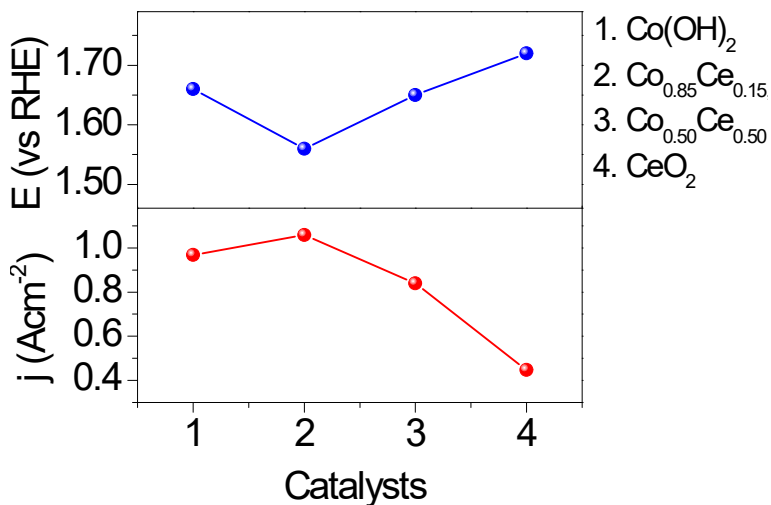

**Fig. S17.** Cell voltage required to reach a current density of 10 mAcm<sup>-2</sup> and the maximum current density obtained for the Co(OH)<sub>2</sub>, Co<sub>1-x</sub>Ce<sub>x</sub>, and CeO<sub>2</sub> catalysts.

**Table S9.** Full-cell parameters obtained for the electrolyser fabricated using the  $\text{Co}(\text{OH})_2$ ,  $\text{Co}_{1-x}\text{Ce}_x$  (where  $x = 0.15$ , and  $0.50$ ), and  $\text{CeO}_2$  catalysts

| Sample                                               | Cell Potential (V)<br>@ $10\text{mAcm}^{-2}$ | Cell Potential (V)<br>@ $500\text{mAcm}^{-2}$ | Cell Potential (V)<br>@ $1000\text{mAcm}^{-2}$ |
|------------------------------------------------------|----------------------------------------------|-----------------------------------------------|------------------------------------------------|
| $\text{Co}(\text{OH})_2$                             | 1.66                                         | 2.11                                          | -                                              |
| <b><math>\text{Co}_{0.85}\text{Ce}_{0.15}</math></b> | <b>1.56</b>                                  | <b>2.05</b>                                   | <b>2.27</b>                                    |
| $\text{Co}_{0.50}\text{Ce}_{0.50}$                   | 1.65                                         | 2.18                                          | -                                              |
| $\text{CeO}_2$                                       | 1.72                                         | -                                             | -                                              |

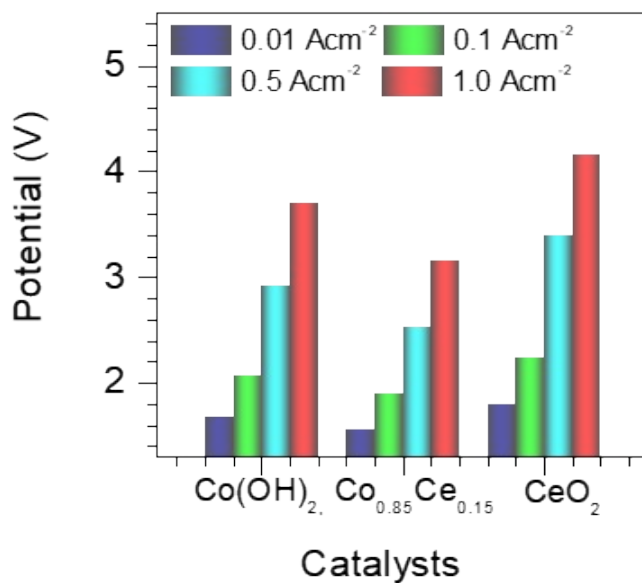

**Fig. S18** Full-cell performance of  $\text{Co}_{0.85}\text{Ce}_{0.15}$  compared with pure  $\text{Co}(\text{OH})_2$  and  $\text{CeO}_2$  at a current density of 0.01, 0.1, 0.5, and 1.0  $\text{Acm}^{-2}$ .

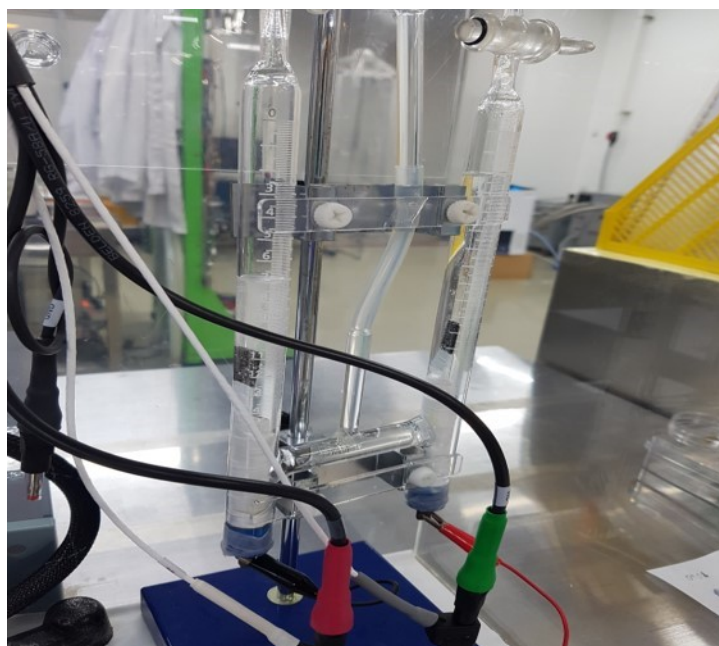

**Fig. S19.** Image of the experimental setup used to estimate the Faradaic efficiency by collecting the hydrogen and oxygen gas evolved at the cathode and anode, respectively.

**Table S10.** Cell voltage required to obtain a current density of 10, 500, and 1000  $\text{mAcm}^{-2}$  at different temperatures for the electrolyzers fabricated using the  $\text{Co}_{1-x}\text{Ce}_x$  catalysts (where  $x = 0.05, 0.15, 0.25,$  and  $0.50$ ).

| Temperature<br>(°C) | Cell Potential (V)<br>@ 10 $\text{mAcm}^{-2}$ | Cell Potential (V)<br>@ 500 $\text{mAcm}^{-2}$ | Cell Potential (V)<br>@ 1000 $\text{mAcm}^{-2}$ |
|---------------------|-----------------------------------------------|------------------------------------------------|-------------------------------------------------|
| 25                  | 1.56                                          | 2.05                                           | 2.27                                            |
| 35                  | 1.53                                          | 1.98                                           | 2.17                                            |
| 45                  | 1.50                                          | 1.94                                           | 2.11                                            |
| 55                  | 1.48                                          | 1.90                                           | 2.07                                            |

## References

- [S1] A. I. Inamdar, H. S. Chavan, S. M. Pawar, H. Kim. H. Im, *Int. J. Energy Res.* 2020, **44**, 1789-1797.
- [S2] G. Zhang, Y. Meng, B. Xie, Z. Ni, H. Lu, S. Xia, *Appl. Catal. B: Environ.* 2021, **296**, 120379.
